# Supplementary material
Source: publisher site journal article supplement (https://www.dovepress.com/article/381138)
Supplement: Supplementary file 1 [file get_supplementary_file.php]

# Supplementary Materials

**Supplementary** **Table 1** Unit Costs of Resources Related to COPD Health States (Model Input)

|  | Unit Cost (2019 £) |
| --- | --- |
| Emergency room visit29 | 166.08 |
| Specialist visit29 | 145.60 |
| General practitioner visit35 | 39.00 |
| Other healthcare provider visit34 | 68.24 |
| Home visit – physician31,35 | 48.45 |
| Home visit – other healthcare provider31,35 | 17.50 |
| Telephone call – physician31,35 | 30.18 |
| Telephone call – other healthcare provider31,35 | 4.20 |
| Ambulance transport35 | 133.00 |
| Spirometry (per event)29 | 151.64 |
| Influenza vaccination33 | 6.59 |
| Oxygen therapy (per day of treatment)29 | 150.63 |

**Note:** Superscripts represent citations to the literature from which the data were sourced; citations are referenced at the end of the main article.

**Abbreviation:** COPD, chronic obstructive pulmonary disease.

**Supplementary Table 2** Healthcare Resource Cost Breakdown for Moderate and Severe Exacerbations (Model Input)

|  | Unit Cost (2019 £) | Moderate  Exacerbation | Severe Exacerbation |
| --- | --- | --- | --- |
| Units | Units |
| Hospitalization ICU (days)34 | 2217.00 | 0 | 0.36 |
| Hospitalization CCU (days)34 | 917.36 | 0 | 0.07 |
| Hospitalization GW (days)34 | 483.35 | 0 | 5.61 |
| Oral corticosteroids for 7 days33 | 7.28 | 0.5 | 0 |
| Oral corticosteroids for 14 days33 | 14.56 | 0.5 | 0 |
| Ambulance transport35 | 133.00 | 0 | 0.29 |
| General practitioner visit35 | 39.00 | 1.0 | 0 |
| Total cost per exacerbation (2019 £) | | 49.92 | 3627.61 |

**Note:** Superscripts represent citations to the literature from which the data were sourced; citations are referenced at the end of the main article.

**Abbreviations:** CCU, coronary care unit; GW, general ward; ICU, intensive care unit.

**Supplementary Table 3** Rescue Medication Usage in ETHOS (Model Input)

|  | BGF | GFF | BFF |
| --- | --- | --- | --- |
| Number of rescue medication inhalations per month |  |  |  |
| Moderate COPD | 54.8 | 67.0 | 60.9 |
| Severe COPD | 82.2 | 91.3 | 91.3 |
| Very severe COPD | 115.7 | 124.8 | 137.0 |

**Notes:**COPD health states were defined by lung function, as determined by FEV1.5 Moderate COPD: FEV1 ≥ 50 to < 80% predicted (based on GOLD 2). Severe COPD: FEV1 ≥ 30 to < 50% predicted (based on GOLD 3). Very severe COPD: FEV1, < 30% predicted (based on GOLD 4). Cost per inhalation of salbutamol was £0.06;33 monthly costs, calculated based on the above inhalations per month, are presented in Table 3 (main article).
Superscripts represent citations to the literature, which are referenced at the end of the main article.
**Abbreviations:** BFF, budesonide/formoterol fumarate dihydrate 320/10 μg; BGF, budesonide/glycopyrronium/formoterol fumarate dihydrate 320/14.4/10 μg; COPD, chronic obstructive pulmonary disease; FEV1, forced expiratory volume in 1 second; GFF, glycopyrronium/formoterol fumarate dihydrate 14.4/10 μg; GOLD, Global Initiative for Chronic Obstructive Lung Disease.

**Supplementary Table 4** Probabilistic Distribution According to Parameter (Model Input for Probabilistic Sensitivity Analysis)

| Parameter | Distribution (Alternative) | Justification |
| --- | --- | --- |
| Costs  Emergency room visits cost (2019 £) | Gamma | Bounded by 0; positively skewed |
| Specialist visit cost (2019 £) |
| General practitioner visit cost (2019 £) |
| Other healthcare provider visit cost (2019 £) |
| Telephone calls – physician cost (2019 £) |
| Telephone calls – other healthcare provider cost (2019 £) |
| Hospitalization ICU (days) cost (2019 £) |
| Hospitalization GW (days) cost (2019 £) |
| Oral corticosteroids for 7 days cost (2019 £) |
| Oral corticosteroids for 14 days cost (2019 £) |
| Ambulance transport cost (2019 £) |
| Exacerbation follow-up costs (2019 £) per event – moderate and severe exacerbations |
| Rescue medication inhalations per month – moderate, severe, very severe COPD – BGF, GFF, BFF |
| Additional treatment-specific costs – resource consumption per month – BGF, GFF, BFF |
| Additional treatment-specific costs – resource cost (2019 £) |
| Mild adverse events cost (2019 £) |
| Severe adverse events cost (2019 £) |
| Very severe adverse events cost (2019 £) |
| Resource use  Emergency room visits monthly – moderate, severe, very severe COPD | Gamma | Bounded by 0; positively skewed |
| Specialist visit monthly – moderate, severe, very severe COPD |
| General practitioner visit monthly – moderate, severe, very severe COPD |
| Other healthcare provider visit monthly – moderate, severe, very severe COPD |
| Telephone calls physician monthly – moderate, severe, very severe COPD |
| Telephone calls other healthcare provider monthly – moderate, severe, very severe COPD |
| Oral corticosteroids for 7 days per day – moderate exacerbation |
| Oral corticosteroids for 14 days per day – moderate exacerbation |
| General practitioner visit per day – moderate exacerbation |
| Hospitalization ICU (days) per day – severe exacerbation |
| Hospitalization GW (days) per day – severe exacerbation |
| Ambulance transport per day – severe exacerbation |
| Probabilities | Beta | Bounded between 0 and 1 |
| Utilities | Beta | Bounded between 0 and 1 |
| Relative treatment effects (relative risk/rate ratio) | Lognormal | Appropriate for ratios (treatment effect) |

**Notes:** COPD health states were defined by lung function, as determined by FEV1.5 Moderate COPD: FEV1 ≥ 50 to < 80% predicted (based on GOLD 2). Severe COPD: FEV1 ≥ 30 to < 50% predicted (based on GOLD 3). Very severe COPD: FEV1, < 30% predicted (based on GOLD 4).
Superscripts represent citations to the literature, which are referenced at the end of the main article.

**Abbreviations:** BFF, budesonide/formoterol fumarate dihydrate 320/10 μg; BGF, budesonide/glycopyrronium/formoterol fumarate dihydrate 320/14.4/10 μg; COPD, chronic obstructive pulmonary disease; FEV1, forced expiratory volume in 1 second; GFF, glycopyrronium/formoterol fumarate dihydrate 14.4/10 μg; GOLD, Global Initiative for Chronic Obstructive Lung Disease; GW, general ward; ICU, intensive care unit.

**Supplementary Table 5** Independent Ethics Committees and Institutional Review Boards Consulted for the ETHOS Study

| **Name of ethics committee/institutional review board** | **Address** | | |
| --- | --- | --- | --- |
| Argentina | | | |
| Comité de Ética en Investigacion | INAER Arenales 3146 1° A (C1425BEN)  Ciudad Autónoma de Buenos Aires, Argentina | | |
| CCIS and Local EC Comité de Etica de CER Investigaciones Clinicas (CECIC) Pdte | Perón N° 489 2°C (CP1878)  Quilmes Oeste, Buenos Aires, Argentina | | |
| Comité de Ética | Ave Pulmo, Alvear 3345  Mar del Plata, Buenos Aires, Argentina | | |
| Comité Independiente de Etica para  Ensayos en Farmacología Clínica | CIEFC Av Cabildo1536 piso 5° B CABA (C1426ABP) Buenos Aires, Argentina | | |
| CCIS and Local EC: Comité de Bioética | Cimel Tucumán 1314  Lanús Este, Buenos Aires, Argentina | | |
| Comité lndependiente de Ética de Investigación en Salud | Av. Colon 2057 Córdoba (X5003DCE)  Cordoba, Argentina | | |
| Comité lndependiente de Ética Iniciativa y Reflexión Bioética | Rosario Rioja 2926, Rosario, Santa Fé (S20020JN) Argentina | | |
| CCIS and Local EC: Comité de Ética en Investigación | lnstituto de Investigaciones Clínicas Av. Colón 3364 B7600FZN, Mar del Plata, Argentina | | |
| CCIS and Local EC: CEI CIM-MDP | Av. Colón 3083. Piso 5. CP 7600 Mar del Plata, Buenos Aires, Argentina | | |
| CCIS and Local EC: Comité de Ética y Docencia de Diagnóstico Maipú (CEDIMA) | Av. Pte. Perón 999, San Fernando Buenos Aires, Argentina | | |
| CCIS and Local EC: Comité de Ética en Investigación | Instituto Ave Pulmo, Alvear 3345, Mar del Plata Buenos Aires, Argentina | | |
| Comité lndependiente de Etica Medica del Noroeste Argentino | Las Piedras 496, 4° Piso, San Miguel de Tucumán  Tucuman, Argentina | | |
| CCIS and Local EC: Comité de Ética del lnstituto Medico Platense (CEDIMP) | Boulevard 51 N°335  La Plata, Buenos Aires, Argentina | | |
| CCIS and Local EC: CEI CEMER –  Comité de Ética en Investigación de CEMER | Esmeralda 1550 (B1602DQD), Florida, Vicente López  Buenos Aires, Argentina | | |
| Comité de Ética lndependiente Consultorios Integrados | CEICI Italia 424, Rosario ZC 2000  Santa Fé, Argentina | | |
| Comité de Ética en Investigación Clínica (CEIC) | Larrea 1381 3°"A'', Ciudad Autonóma de Buenos Aires  Buenos Aires, Argentina | | |
| Comité de Ética en Investigación (CEI) del Centro de Investigaciones Metabólicas | Viamonte 2278, C1056ABJ  CABA, Argentina | | |
| Comité de Ética en Farmacología Clínica de la Fundación (CIDEA) | CEFC Paraguay 2041 Piso 9°H (C1121ABE)  CABA, Argentina | | |
| Comité de Etica para Investigación Clínica | Alvear 854 – S2000, Rosario  Santa Fé, Argentina | | |
| Comité de Ética Independiente | Patagónico, Urquiza 646, Santa Rosa (6300) La Pampa, Argentina | | |
| FumeLit (Fundación Médica del Litoral) | Av Freyre 3048–3000  Santa Fé, Argentina | | |
| Comité lndependiente de Etica en Investigación Biomédica de la Fundación Neurólogica Argentina | Uruguay 824, Piso 1, C1015ABR  Ciudad Autónoma de Buenos Aires, Argentina | | |
| Australia | | | |
| Belberry Ltd | 129 Glen Osmond Rd, Eastwood  SA 5063, Australia | | |
| Western Sydney Local Health District HREC Research Office | Level 2, REN Building, Westmead Hospital, Hawkesbury & Darcy Roads,  Westmead, NSW 2145, Australia | | |
| Austria | | | |
| Ethikkornrnission für das Bundesland Salzburg | Sebastian-Stief-Gasse, 2 5020  Salzburg, Austria | | |
| Belgium | | | |
| Cliniques Universitaires UCL, Bruxelles | Comité d'Ethique Hospitalo, Facultaire Saint-Luc, UCL, OM 003, Belgium | | |
| Canada | | | |
| Nova Scotia Health Authority Research Ethics Board (NSHA REB) | 5790 University Avenue, Room 118, CCR Building, Halifax, Nova Scotia, B3H 1V7, 902-470-6511, Canada | | |
| Concordia Hospital Ethics Committee | 1095 Concordia Avenue, Winnipeg, Manitoba, Canada  R2K3S8 204-661-7160 | | |
| Health Research Ethics Board of Alberta Clinical Trials | Committee 1500, 10104–103 Avenue NW  Edmonton, Alberta, T5J 4A7, Canada  877-423-5727 | | |
| IUCPQ Research Ethics Committee | Institut Universitaire de Cardiologie et de Pneumologie de Québec  Université Laval 2725  Chemin Sainte-Foy  Québec, G1V 405, Canada  418-656-8711 | | |
| University of Saskatchewan Research Ethics Board (REB) or Committee 1607 | 110 Gymnasium Place, S7N OW9, Canada  306-966-2975 | | |
| Hamilton Integrated Research Board | 293 Wellington Street North, Suite 102  Hamilton, Ontario, Canada  L8L 8E7 905-521-2100 X42013 | | |
| Chile | | | |
| Comité Ético Científico del Servicio de Salud Metropolitano | Sur OrienteAvenida Concha y Toro  3459 Puente Alto, Santiago, Chile | | |
| Comité de Ética Científico Cientfifico del Servicio de Salud Metropolitano | SurAvenida Santa Rosa 3453 San Miguel, Santiago, Chile | | |
| Comité de Ética Científico del Servicio de Salud Metropolitano | Oriente Avenida Salvador 364, Providencia, Santiago, Chile | | |
| Comité Ético Científico del Servicio de Salud Viña del Mar | Quillota Calle Limache 1307 Viña del Mar, Valparaíso, Chile | | |
| Comité Ético Científico Servicio de Salud Valparaiso–San Antonio |  | | |
| Comité Ético Científico Servicio de Salud Concepción |  | | |
| China | | | |
| China-Japan Friendship Hospital Medicine/Medical Device Clinical Trial Ethics Committee | No. 2 East Sakura Road, Heping li, Chaoyang District, Beijing, China | | |
| Medical Ethics Committee of Hebei General Hospital | Room 623, 6th Floor, Outpatient Building, Hebei General Hospital, No.348 Heping West Road, Shijiazhuang, Hebei Province, China | | |
| The First Affiliated Hospital of Soochow University Ethics Committee | No. 188 Shizi Street, Suzhou  Jiangsu Province, China | | |
| Ethics Committee of Beijing Chao-Yang Hospital Capital Medical University | Room 307, West Yard, Beijing  Chao-Yang Hospital, Beijing, China | | |
| Ethics Committee of Beijing Friendship Hospital  Capital Medical University | No. 95 Yongan Road, Xicheng District, Beijing, China | | |
| Ethics Committee on Drug Clinical Trials of The Second Hospital of Sun Qian Hebei Medical University | No. 215 Heping West Road, Shijiazhuan City, Hebei Province, China | | |
| Ethics Committee of Beijing Anzhen Hospital | No. 2 Anzhen Road, Chaoyang District, Beijing, China | | |
| Anhui Province Hospital Clinic  Research Ethic Committee | No. 17 Lujiang Road, Luyang District  Hefei City, Anhui Province, China | | |
| Huadong Hospital Affiliated to Fudan University, Ethics  Committee | No.221 Yan’an West Road, Jing'an  District, Shanghai, China | | |
| Ethics Committee of Qinghai Provincial People's Hospital | The second floor of the complex  building, No. 2 Gonghe Road  Chengdong Distric, Xi'ning City  Qinghai Province, China | | |
| EC of Central Hospital of Minhang District | No. 170 Xinsong Road, Shanghai, China | | |
| Ethics Committee for Institutional Review of Affiliated Hospital of Guangdong Medical College | 57 Renmin Avenue, Zhanjiang City  Guangdong Province, China | | |
| Ethics Committee of The Affiliated Hospital of Xuzhou Medical College | 99 Huaihai West Road, Quanshan District, Xuzhou, Jiangsu Province, China | | |
| Drug Clinical Trial Ethics Lei Luo Committee of Guizhou Provincial People's Hospital | No. 83 East Zhongshan Road, Guiyang, Guizhou Province, China | | |
| EC of Sir Run Shawn Hospital School of Medicine  Zhejiang University | No. 3 East Qingchun Road, Hangzhou, Zhejiang Province, China | | |
| Ethics Committee of the First Hospital of Lanzhou University | The Second Floor of the Bachelor Apartment, No 1 Donggang West Road, Chengguan District, Lanzhou City, Gansu Province, China | | |
| Medical Ethics Committee of Affiliated Hospital of Guizhou Medical University | 10th Floor, North Campus of Guizhou Medical University, No. 9 Beijing Road  Guiyang Province, China | | |
| Drug Clinical Trial Ethics Committee of Shenzhen People's Hospital | No. 1017 Dongmen North Road, Shenzhen City  Guangdong Province, China | | |
| Ethics Committee of The Second People's Hospital of Shenzhen | No. 3002 Sungang West Road, Futian District, Shenzhen City, Guangdong Province, China | | |
| Ethics Committee on Drug Clinical Trials of The First Affiliated Hospital of Baotou Medical College Inner Mongolia University of Science and Technology | No. 41 Linyin Road, Kundulun District, Baotou City  The Inner Mongolia Autonomous Region Province  China | | |
| Biomedical Ethics Committee of Haikou People's Hospital | 43 Renmin Avenue, Haikou City, China | | |
| Ethics Committee of Xiangya Hospital Central South University | No. 87 Xiangya Road, Kaifu District, Changsha  Hunan Province, China | | |
| Ethics Committee of Guangzhou Red Cross Hospital | No. 396 Tongfuzhong Road, Haizlm District, Guangzhou City, Guangdong Province China | | |
| Medical Ethics Committee of the Second Affiliated Hospital of Nanchang University | 10th Floor, Zonghe Building, No. 1 Minde Road, Nanchang, Jiangxi Province, China | | |
| Ethics Committee of The Third Hospital of Hebei Medical University | Room 281, Research Building, The Third Hospital of  Hebei Medical University, 139 Ziqiang Road, Qiaoxi District, Shijiazhuang City Hebei Province, China | | |
| Drug Clinical Trial Ethics Committee of Yanbian University Hospital | Room 310, Administrative Building, No. 1327 Juzi Street, Yanji City, Jinlin Province China | | |
| Ethics Committee of the First Hospital of Changsha | No. 311 Yingpan Road, Kaifu District, Changsha, Hunan Province, China | | |
| Ethics Committee of Nanjing First Hospital | 68 Changle Road, Qinhuai District  Nanjing City, Jiangsu Province, China | | |
| EC of The Second Affiliated Hospital of Nanjing Medical  University | No. 121 Jiangjiayuan, Gulou District Nanjing City, Jiangsu Province, China | | |
| EC of Hangzhou First People's Hospital | No. 261 Huansha Road  Shangcheng District, Hangzhou, Jiangsu Province, China | | |
| Clinical Trial Ethics Sub-Committee, West China Hospital | Sichuan University  Room 412, Old No. 8 Teaching Building, West China Hospital, Sichuan University, No. 37 Guoxue Lane, Wuhou District, Chengdu, Sichuan Province, China | | |
| Biomedical Research Ethics Committee of Peking University | First Hospital  No. 8 Xishiku Avenue, Xicheng District, Beijing, China | | |
| Ethics Committee of the First Hospital of China Medical  University | Office of Ethics Committee  11th Floor, Building 1, No. 92 North Second Road, Heping Dstrict, Shenyang Liaoning Province, China | | |
| Ethics Committee of the First Hospital of China Medical  University | 151 Li Bing Road, Zhangjiang Hi-Tech Park  Shanghai 201203, China | | |
| EC of Jiangsu Province Hospital | No. 300 Guangzhou Road, Gulou District  Nanjing, Jiangsu Province, China | | |
| EC of The First Affiliated Hospital | College of Medicine, Zhejiang University  No. 79 Qingchun Road, Uptown District, Hangzhou, Zhejiang Province, China | | |
| EC of Jiangxi Pingxiang People's Hospital | No.8 Zhongda Road, Wugong  Mountain Development Area, Pingxiang City, Hunan Province, China | | |
| Ethics Committee for The First Affiliated Hospital of Guangxi Medical University | No. 6 Shuangyong Road, Nanning City Guangxi Province, China | | |
| Ethics Committee of the First People's Hospital of Changde | The Second Floor Corridor of No. 2 and No. 3 inpatient building No. 818 Renmin Road, Wuling District  Changde City, Hunan Province, China | | |
| Clinical Drug-Device and New Medical Technologies Ethics Committee of The First Affiliated Hospital | Sun Yat-sen University, No. 58 Zhongshan 2nd Road, Yuexiu District, Guangzhou City, Guangdong Province, China | | |
| Ethics Committee of Wuhan Forth Hospital | 473 Hanzheng Street, Qiekou District  Wuhan City, China | | |
| Ethics Committee of Changsha Central Hospital | Room 205 of the Pharmaceutical Sciences Building, No. 161 Shaoshannan Road Yuhua District, Changsha City, Hunan Province, China | | |
| Ethics Committee of Xiangtan Central Hospital Clinical Drug Trial | The Fifth Floor of the Outpatient Building, No. 120 Heping Road  Xiangtan City, Hunan Province, China | | |
| EC of Shanghai East Hospital, Tongji University | No. 1800 Yuntai Road Pudong District, Shanghai, China | | |
| Ethics Committee of The Affiliated Hospital of Inner Magnolia Medical University | No. 1 North Road, Huimin District  Hohhot, Inner Mongolia, China | | |
| EC of Taizhou Hospital of Zhejiang Province | No. 150 Ximen Road, Linhai City  Zhejiang Province, China | | |
| Ethics Committee of Inner Mongolia People's Hospital | No. 20 Zhaowuda Road, Hohhot,  Inner Mongolia, China | | |
| Clinical Research and Applied Ethics Committee of The Third Affiliated Hospital of Guangzhou Medical University | No.63 Duobao Road, Liwan  District, Guangzhou City,  Guangdong Province, China | | |
| Czech Republic | | | |
| CEC Etická komise Fakultni Nemocnice Královské Vinohrady | Šrobárova 1150/50 Praha 10, 100 34, Czech Republic | | |
| LEC Lokální Etická Komise Nemocnice Mělník | Pražská 528, 276 01 Mělník  Czech Republic | | |
| LEC Etická Komise Krajská Nemocnice Liberec, a.s. | Husova 10  460 63, Liberec 1, Czech Republic | | |
| LEC Etická Komise Nemocnice Rudolfa a Stefanie Benešov, a.s., Nemocnice Stơedočeského Kraje | Máchova 400  256 30 Benešov, Czech Republic | | |
| France | | | |
| CPP Sud Est III Groupement Hospitalier Est Bâtiment Pinel | 59 Boulevard de Pinel  69 500 Bron, France | | |
| Germany | | | |
| Ethikkommission der Medizinischen Hochschule Hannover | Carl-Neuberg-Str. 1, 30625 Hannover, Germany | |
| Hungary | | |
| CEC Medical Research Council Ethics Committee for Clinical Pharmacology (MRC-ECCP)/Egészségügyi Tudományos Tanács Klinikai Farmakológiai Etikai Bizottsaga (ETT-KFEB) | | 1051 Budapest, Arany János u. 6–8, Hungary |
| Italy | | |
| CEC Comitato Etico Milano Area B Fondazione IRCCS Ca' Granda Ospedale Maggiore Policlinico | | Via Francesco Sforza, 28 20122 Milano, Italy |
| LEC Comitato Etico | | Milano Area 2 Via F. Sforza n. 28 20122 Milano, Italy |
| LEC Comitato Etico Regione Toscana Area Vasta Nord Ovest | | Via Roma 67, 56126 Pisa, Italy |
| LEC Comitato Etico | | Viale del Policlinico 155 00161 Roma, Italy |
| LEC Comitato Etico Milano Area 1 | | Via G.B. Grassi, 74 20157 Milano, Italy |
| LEC Comitato Etico Milano Area B Fondazione IRCCS Ca' Granda Ospedale Maggiore Policlinico | | Via Francesco Sforza, 28 20122 Milano, Italy |
| LEC Comitato Etico Seconda Università degli Studi di Napoli Ospedale dei Colli | | Via Leonardo Bianchi snc, 80131 Napoli, Italy |
| LEC Comitato Etico Area 1 | | AOU Ospedali Riuniti Foggia, Viale Luigi Pinto, 1  71122 Foggia, Italy |
| LEC Comitato Etico lnteraziendale della Provincia di Messina AOU Policlinico "G. Martino" | | Via Consolare Valeria n. 1 98125, Messina, Italy |
| LEC Comitato Etico dell'Università "Sapienza" | | Viale del Policlinico, 155 00161, Roma, Italy |
| LEC Comitato Etico dell'Università Campus Bio Medico di Roma | | Via Álvaro del Portillo, 200  00128 Roma, Italy |
| LEC Comitato Etico Palermo 1 | | Via del Vespro 129,  90127 Palermo, Italy |
| LEC Comitato Etico di Area Vasta Emilia Centro | | Via Albertoni, 15  40138 Bologna, Italy |
| LEC Comitato Etico della Liguria Largo | | Rosanna Benzi 10  16132 Genova, Italy |
| LEC Comitato Etico Campania Sud | | Via Marconi, 66  80049 – Torre del Greco (NA), Italy |
| LEC Comitato Etico Area Vasta Emilia Nord Policlinico di Modena | | Via Largo del Pozzo 7 41124, Modena, Italy |
| LEC Comiatto Etico Milano Area 3 | | Piazza Ospedale Maggiore, 3 20162 Milano, Italy |
| LEC Comitato Etico Istituti Clinici Scientifici Maugeri SPA - IRCCS | | Via Salvatore Maugeri, 4 7100 Pavia, Italy |
| LEC Comitato Etico Area Vasta Emilia Nord Segreteria Locale di Parma Azienda Ospedaliero-Universitaria di Parma | | Via Gramsci 14 43126 Parma, Italy |
| LEC Comitato Etico Indipendente Policlinico Tor Vergata | | Viale Oxford, 81 – 00133 Roma, Italy |
| LEC Comitato Etico Unico Regionale – C.E.U.R.c/o IRCCS Centro di Riferimento Oncologico C.R.O | | Via Franco Gallini, 2 – 33081 Aviano (PN), Italy |
| LEC Comitato Etico Seconda Università degli Studi di NapoliOspedale dei Colli | | Via Leonardo Bianchi snc, 80131 Napoli, Italy |
| Japan | | |
| 1-19-35 | | Hagiwara, Oita,  870-0921, Japan |
| Nagata Hospital | | 523-1, Shimomiyanagamachi  Yanagawa-shi, Fukuoka, 832-0059, Japan |
| Sakaide City Hospital | | 3-1-2, Kotobukicho, Sakaide-shi  Kagawa, 762-8550, Japan |
| Kinki University Hospital | | 377-2, Onohigashi, Osakasayama-shi  Osaka, 589-8511, Japan |
| Tosei General Hospital | | 161, Nishioikawa-cho, Seto-shi  Aichi, 489-8642, Japan |
| Showa University Hospital | | 1-5-8, Hatanodai, Shinagawa-ku  Tokyo, 142-8666, Japan |
| Mexico | | |
| Mexico Centre For Clinical Research | | 709, Col. Del Valle, Del. Benito Juárez, Ciudad de México, C.P. 03100, Mexico |
| Comité de ética en Investigación del Instituto Jalisciense de Investigación Clínica | | Calle Penitenciaria 20. Colonia Centro, Mexico |
| Unidad de Investigación Clínica en Medicina, S.C. | | Avenida de la Clinica no. 2520, Int.  520. Colonia Sertoma, C.P. 64718. Monterrey, Nuevo León, Mexico |
| CEI Hospital La Misión S.A. de C.V. | | Avenida del Hospital 112, I° y 2° piso, Col. Sertoma, C.P. 64718  Monterrey, Nuevo León, Mexico |
| Netherlands | | |
| METC Stichting BEBO | | Stationsstraat 9  9401 KV Assen, The Netherlands |
| New Zealand | | |
| Health and Disability Ethics Committee | | Ministry of Health, Freyberg Building 20 Aitken Building, PO BOX 5013 Wellington 6001, New Zealand |
| Peru | | |
| Comité Institucional de Etica en Investigación de la  Asociación Benéfica Prisma | | Calle Carlos Gonzáles 251 San Miguel  15088 Lima, Perú |
| Comité de Ética en lnvestigación del Hospital Nacional  Guillermo Almenara Irigoyen – ESSALUD | | Av. Miguel Grau 800 La Victoria 15033, Perú |
| Comité Institucional de Ética en la Investigación del Hospital Nacional | | Cayetano Heredia, Av. Honorio Delgado 430, Urb Ingenierfa, San Martin de Porres, Lima, Perú |
| Comite Institucional de Bioética de Via Libre | | Paraguay 478, Cercado de Lima 15001, Perú |
| Poland | | |
| Komisja Bioetycma przy Śląskiej Izbie Lekarskiej | | ul. Grażyńskiego 49a 40-126 Katowice, Poland |
| Russia | | |
| Independent Interdisciplinary Committee on Ethics Evaluation of Clinical Trials | | 20, Build. 1, Delegatskaya Str.,  127473, Moscow, Russia |
| LEC at Federal State Institution "Federal Scientific Clinical Center of Specialized Kinds of Medical Care and Medical Technology of the Federal Medical and Biological Agency" | | 28 Orekhovy Bulv., 115682, Moscow, Russia |
| EC at Federal State Governmental Establishment  Burdenko Main Military Clinical Hospital of Russian Federation Defense Ministry | | 3 Hospitalnaya Square, 105229, Moscow, Russia |
| LIEC at SBHI of Leningrad Region Gatchina Clinical Interdistrict Hospital | | 15a, bid. I, Roshchinskaya Str., Gatchina, Leningrad Region, 188300, Russia |
| LEC at Non-governmental Private Healthcare Institution Scientific Clinical Center of Joint Stock Company Russian Railways | | 20 Chasovaya Str., 125315, Moscow, Russia |
| LEC at Municipal Autonomous Institution City Clinical Hospital | | #14 15B, 22 Partsyezda Str.  620039, Ekaterinburg, Russia |
| LEC at the State Budgetary Healthcare Institution of Moscow | | "City Clinical Hospital #51 of Healthcare Department of Moscow"  7/33 Alyabyeva Str.  121309, Moscow, Russia |
| FGBU "Policlinika #5" | | 14 Plushchiha Str.  119121, Moscow, Russia |
| PharmNadzor LLC3 | | Torzhkovskaya Str., Office 230, Saint-Petersburg  197342, Russia |
| LEC at SBHI of Lerringrad Region Occupational Pathology Center | | 27, Lit. 0, Mechnikov Av., Saint­Petersburg, 195271, Russia |
| EC at SBEI HPE "First Saint­Petersburg State Medical University named after LP. Pavlov" of Ministry of Health of the Russian Federation | | 10 Rentgena Str., Saint­Petersburg, 197101, Russia |
| LEC at Pirogov Russian National Research Medical University | | 1 Ostrovityanova Str., 117997, Moscow, Russia |
| LEC at FSBI «Policlinic No1» of Department for Presidential Affairs of the Russian Federation | | 26/28, Sivtsev Vrazhek Pereulok, Moscow, 119002, Russia |
| LEC at SFEI of HPT "I.M. Sechenov First Moscow State Medical University" of the Ministry of Health of the Russian Federation | | 8, Bld.2, Trubetskaya Str., Moscow, 119991, Russia |
| LEC First City Clinical Hospital named after E.E. Volosevich | | 1 Suvorova Str., 163001, Arkhangelsk, Russia |
| Serbia | | |
| Ethics Committee of Serbia | | Vojvode Stepe 458, 11000 Belgrade, Serbia |
| LEC Institute for Pulmonary Disease Sremska Kamenica | | Put Dr Goldmana 4, 21204 Sremska Kamenica, Serbia |
| LEC Clinical Center of Serbia | | Pasterova 2, 11000 Belgrade, Serbia |
| LEC General Hospital Valjevo | | Sindjeliceva 62, 14000 Valjevo, Serbia |
| LEC CHC Zvezdra | | Dimitrija Tucovica 131, 11000 Belgrade, Serbia |
| LEC Municipal Institute for Lung Diseases and Tuberculosis | | Presevska 36, 11000 Belgrade, Serbia |
| Kliničko Bolnički Centar "Bežanijska Kosa" | | Bežanijska Kosa bb, 11080 Beograd, Serbia |
| Institut za Plućne Bolesti Vojvodine/Institute for Pulmonary Diseases of Vojvodina | | Put dr Goldmana 4  21204 Sremska Kamenica, Serbia |
| Klinički Centar Niš | | Clinical Center Nis  Bulevar dr Zorana Djijdjica 48, 18000 Nis, Serbia |
| Klinički Centar Kragujevac (Clinical Center Kragujevac) | | Zmaj Jovina 30,  34000 Kragujevac, Serbia |
| South Africa | | |
| Pharma-Ethics | | 123 Amcor Road, Lyttleton Manor, Centurion, South Africa |
| University of Stellenbosch HREC | | 5th Floor Teaching Block, Faculty of Medicine and Health Sciences, Francie van Zijl Drive, Parow, South Africa |
| University of Cape Town HREC | | Old Main Building, Groote Schuur Hospital  Floor E52, Room 23, Observatory, Cape Town, South Africa |
| Spain | | |
| CEIC-Parc de Salut MAR IMIM - Institut de Recerca Hospital del Mar | | Pare de Recerca Biomèdica de Barcelona  Cl Doctor Aiguader, 88 08003 Barcelona, Spain |
| Sweden | | |
| Etickprövningsmyndigheten | | Box 2110, 75002 Uppsala, Sweden |
| Taiwan | | |
| CEC Chang Gung Medical Foundation Institutional Review Board | | No. 5 Fusing St., Gueishan Township, Taoyuan City, Taiwan |
| LEC Research Ethics Review Committee, Far Eastern Memorial Hospital | | No 21 Nan-Ya S.R, Pan-Chiao, New-Taipei City, Taiwan |
| LEC Institutional Review Board, Kaohsiung Medical University Chung-Ho Memorial Hospital | | No. 100 Zuyu 1st Road, Kaohsiung City, Taiwan |
| LEC Institutional Review Board, E-Da Hospital | | No.6 Yida Road, Jiao-su Village, Yan-Chao District, Kaohsiung City, Taiwan |
| LEC Taichung Veterans General Hospital Institutional Review Board | | No. 1650 Taiwan Blvd Sec. 4, Taichung City, Taiwan |
| LEC Chang Gung Medical Foundation Institutional Review Board | | 199 Tung Hwa North Road, Taipei City, Taiwan, 10507 |
| LEC Research Ethics Committee, China Medical University & Hospital | | No. 2 Yude Road, North Dist., Taichung City, Taiwan |
| LEC Research Ethics Committee, National Taiwan University Hospital | | No 7, Chung Shan South Road, 100, Taipei, Taiwan |
| United Kingdom | | |
| East Midlands – Leicester South Research Ethics Committee | | Royal Standard Place, Nottingham, NG1 6FS, United Kingdom |
| United States of America | | |
| Advarra d/b/a Schulman Associates Institutional Review Board, Inc. | | 4445 Lake Forrest Drive Suite 300, Cincinnati, OH 45242, USA |
| Johns Hopkins Medicine Office of Human Subject Institutional Review Board | | 1620 McElderry Street Reed Hall, Suite B-130, Baltimore, MD 21205-1911, USA |

**Abbreviations:** CEC, central ethics committee; EC, ethics committee; LEC local ethics committee.
